# Supplementary material for: Loss of the Spinocerebellar Ataxia type 3 disease protein ATXN3 alters transcription of multiple signal transduction pathways
Source: PLOS journal article supplement (doi:10.1371/journal.pone.0204438), 2018-09-19
Supplement: S2 (10.1371/journal.pone.0204438.s002) [file journal.pone.0204438.s002]

| Gene       | Microarray KO/WT<br>(Fold change) | RT-PCR KO/WT<br>(Fold change) | Significance<br>(RT-PCR) |
|------------|-----------------------------------|-------------------------------|--------------------------|
| Sfrp1      | 2.68                              | 2.75                          | *                        |
| Apcdd1     | 1.32                              | -1.12                         | n.s.                     |
| Wnt10a     | -1.01                             | -4.15                         | *                        |
| Wnt5a      | -1.08                             | -2.33                         | *                        |
| Wnt5b      | -1.43                             | -1.12                         | n.s.                     |
| Wnt6       | -1.54                             | #DIV/0!                       | **                       |
| Dkk3       | -2.19                             | -4.00                         | *                        |
| Lrp11      | -1.48                             | -1.79                         | *                        |
| Cdh13      | -2.51                             | -170.34                       | ***                      |
| Bmp1       | 1.41                              | 1.08                          | n.s.                     |
| Csf2ra     | 1.65                              | 5.78                          | **                       |
| Hck        | 1.92                              | 3.99                          | *                        |
| Lyn        | -1.4                              | -3.31                         | *                        |
| Lefty1     | -1.75                             | -3.60                         | **                       |
| Dcn        | 1.92                              | 4.48                          | *                        |
| Ltbp4(a,b) | -1.04                             | -2.67                         | **                       |
| Grem1      | 1.54                              | 2.05                          | *                        |
| Bmp4       | -1.22                             | -2.36                         | *                        |
| Efn3       | 6.11                              | #DIV/0!                       | ***                      |
| Fgd4       | 1.16                              | 2.07                          | ****                     |
| Arhgdib    | -1.26                             | -2.05                         | **                       |
| Chn2       | 1.03                              | 2.47                          | *                        |
| IL7        | 1.02                              | 1.69                          | *                        |
| IL1rn      | 3.06                              | 14.44                         | **                       |
| IL6        | 1.03                              | 3.40                          | **                       |

**S2 Table. Comparison of microarray and real-time PCR (RT-PCR) fold change of differentially regulated components of signaling pathways.** 22 of the 25 differentially expressed microarray genes were confirmed to have significant changes in *Atxn3*-KO MEFs relative to WT MEFs by RT-PCR (red shading=upregulated; green shading=downregulated). n.s.=not significant; \*  $p<0.05$ , \*\*  $p<0.01$ , \*\*\*  $p<0.001$ , \*\*\*\*  $p<0.0001$ .
